# Supplementary material for: Investigating bacterial community changes and organic substrate degradation in microbial fuel cells operating on real human urine
Source: Royal Society of Chemistry journal article supplement (doi:10.1039/c7ew00087a), 2017-01-01
Supplement: c7ew00087a1.pdf [file c7ew00087a1.pdf]

## Supplementary Information

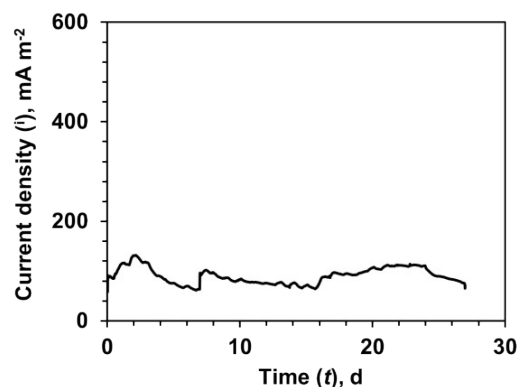

Figure S1 - Measured current density over time with undiluted urine as substrate without any acclimation strategy.

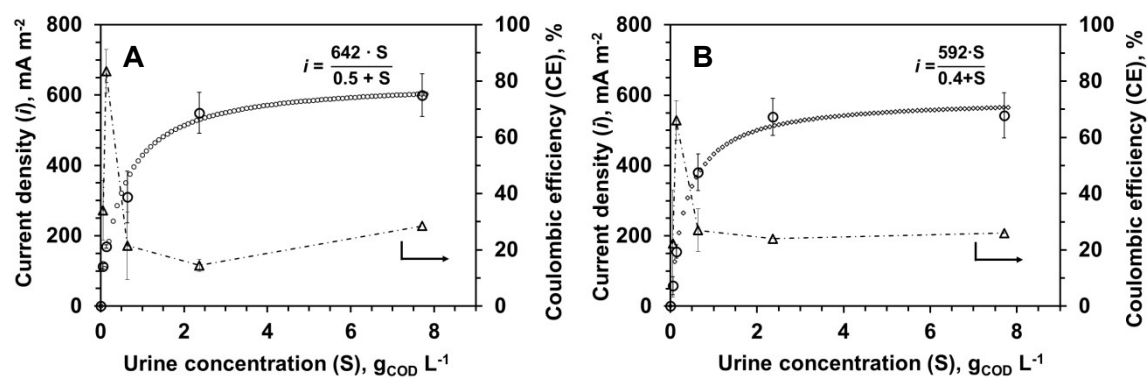

Figure S2 - Correlation between maximum current density and coulombic efficiency with urine concentration for (A) MFC A and (B) MFC B.

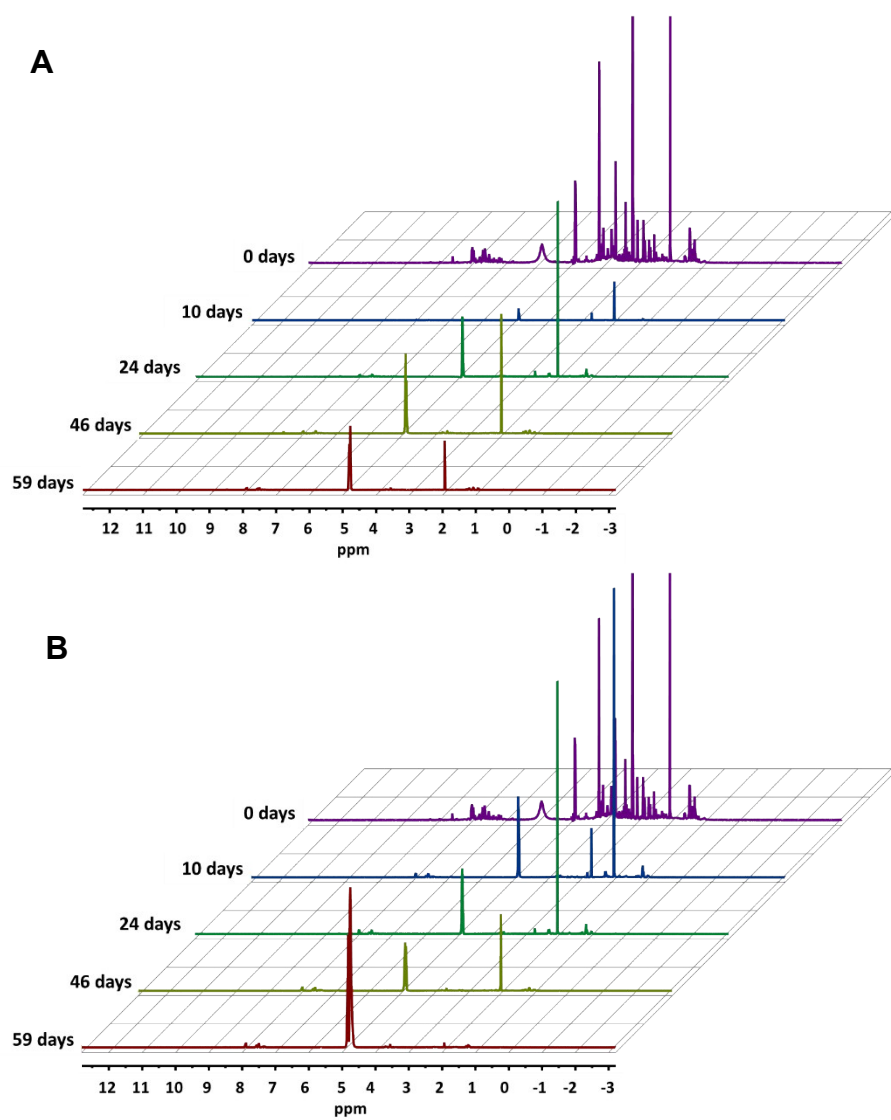

Figure S3 -  $^1\text{H}$  NMR spectral data of analyte from (A) MFC A and (B) MFC B.

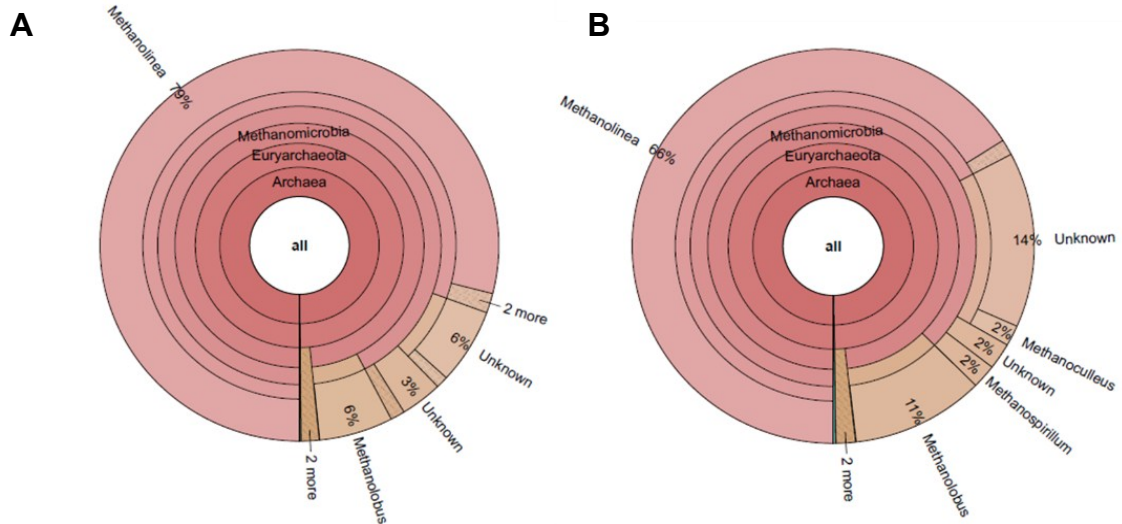

Figure S4 - Archaea community distribution at genus level for biofilms developed in the anode of the (A) MFC A and (B) MFC B.
